# Supplementary material for: Maternal high-fat-diet exposure is associated with elevated blood pressure and sustained increased leptin levels through epigenetic memory in offspring
Source: PubMed Central journal article supplement (PMC7801715; doi:10.1038/s41598-020-79604-4), 2021-01-11
Supplement: 41598_2020_79604_MOESM1_ESM.pdf [file 41598_2020_79604_MOESM1_ESM.pdf]

## Supplementary Information for

### **Maternal high-fat-diet exposure is associated with elevated blood pressure and sustained increased leptin levels through epigenetic memory in offspring**

Xian-Hua Lin<sup>1,3#</sup>, Ling Gao<sup>1#</sup>, Shen Tian<sup>4#</sup>, Christian Klausen<sup>5</sup>, Meng-Xi Guo<sup>2,3</sup>, Qian Gao<sup>4,6</sup>, Miao-E Liu<sup>4</sup>, Hui Wang<sup>7</sup>, Dan-Dan Wu<sup>2,3</sup>, Cheng-Liang Zhou<sup>2,3</sup>, Jing Yang<sup>4</sup>, Ye Meng<sup>4</sup>, Ye Liu<sup>2,3</sup>, Gu-Feng Xu<sup>4</sup>, Ya-Jing Tan<sup>2,3</sup>, Kamran Ullah<sup>4</sup>, Yi-Min Zhu<sup>4</sup>, William D. Fraser<sup>8</sup>, Jian-Zhong Sheng<sup>4,6</sup>, Peter C.K. Leung<sup>5</sup>, Louis J. Muglia<sup>2,9</sup>, Yan-Ting Wu<sup>1,3\*</sup>, He-Feng Huang<sup>1,2,3,4\*</sup>

**Corresponding author:** He-Feng Huang and Yan-Ting Wu

E-mail: [huanghefg@hotmail.com](mailto:huanghefg@hotmail.com), and [yanting\\_wu@163.com](mailto:yanting_wu@163.com)

**Supplementary Figure 1.** Baseline characteristics of pregnant rats in control and HFD rats (F0).

**Fig. S1**

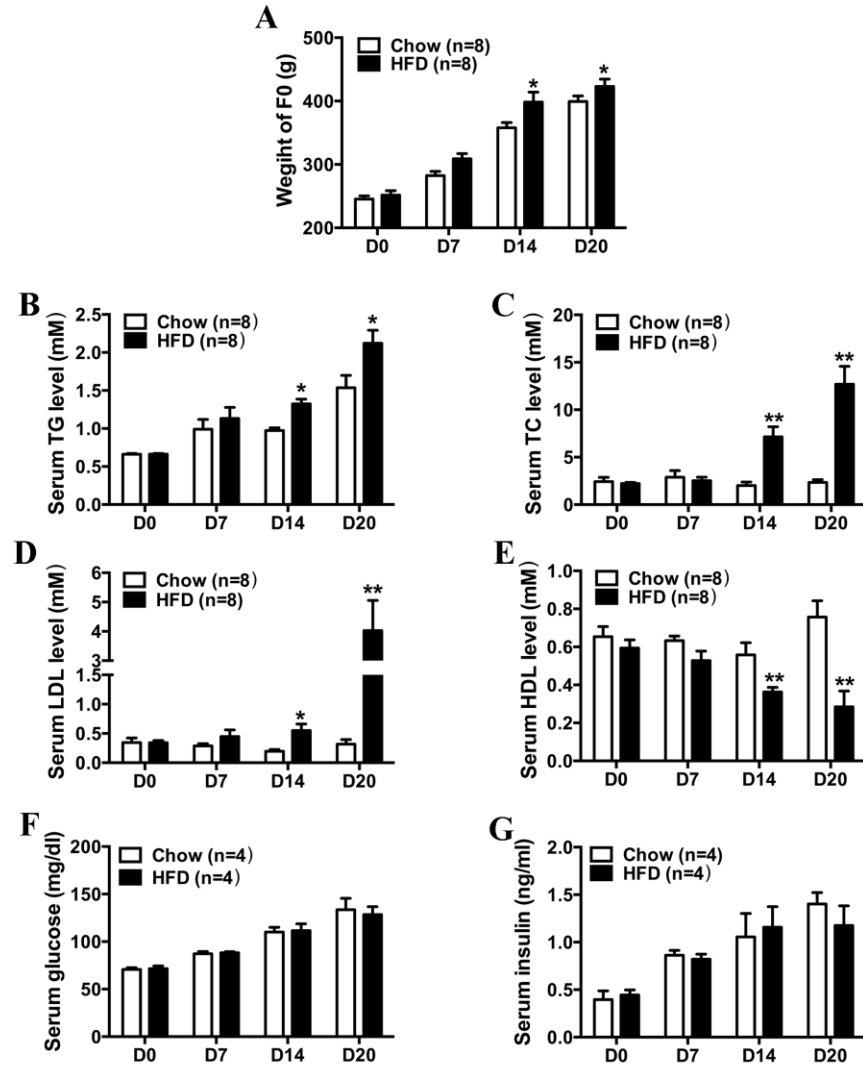

**Fig. S1. Baseline Characteristics of Pregnant Rats in Control and HFD Rats (F0).** (A) Body weights before pregnancy (mating day, D0) and during pregnancy (D7, D14, D20) in chow and HFD female rats. (B, C, D and E) Serum levels of lipids before and during pregnancy in chow and HFD female rats. (F and G) Serum glucose and insulin levels before and during pregnancy in chow and HFD female rats. Values are expressed as means  $\pm$  SE, \* $P < 0.05$ , \*\* $P < 0.01$ , compared to the corresponding control.

**Supplementary Figure 2. Identification of fetal adipose tissue (FAT).**

**Fig. S2**

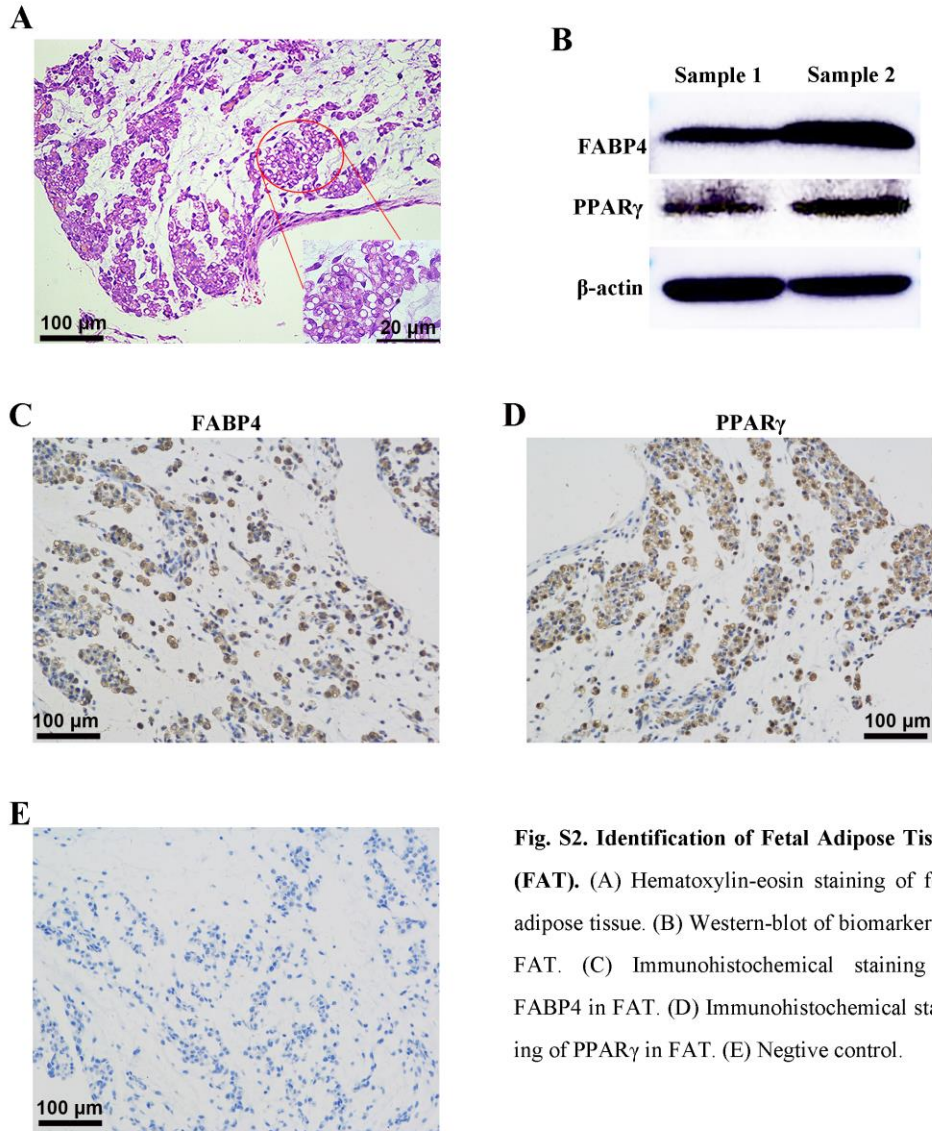

**Fig. S2. Identification of Fetal Adipose Tissue (FAT).** (A) Hematoxylin-eosin staining of fetal adipose tissue. (B) Western-blot of biomarkers in FAT. (C) Immunohistochemical staining of FABP4 in FAT. (D) Immunohistochemical staining of PPAR $\gamma$  in FAT. (E) Negative control.

**Supplementary Figure 3.** Leptin expression in adipose tissues between Chow-F1 and HFD-f1 groups.

**Figure S3**

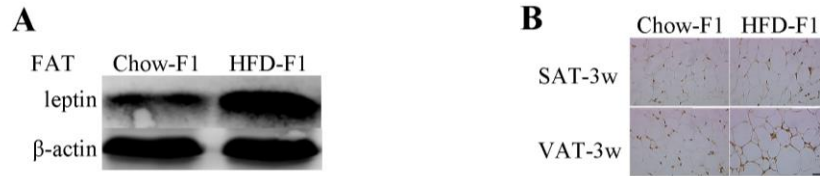

**Fig. S3 Leptin expression in adipose tissues between chow-exposed and HFD-exposed groups.**

(A) Leptin protein levels in FAT from chow-exposed and HFD-exposed rat offspring. The grouping of gels cropped from different parts of the same gel. (B) Immunohistochemical staining of leptin in subcutaneous and visceral adipose tissues (SAT and VAT, respectively) from 3-week-old chow-exposed and HFD-exposed rat offspring ( $\times 400$ , Scale bars: 50  $\mu\text{m}$ ).

**Supplementary Figure 4.** Identification of MSCs isolated from fetal rat (D13) bone marrow.

**Fig. S4**

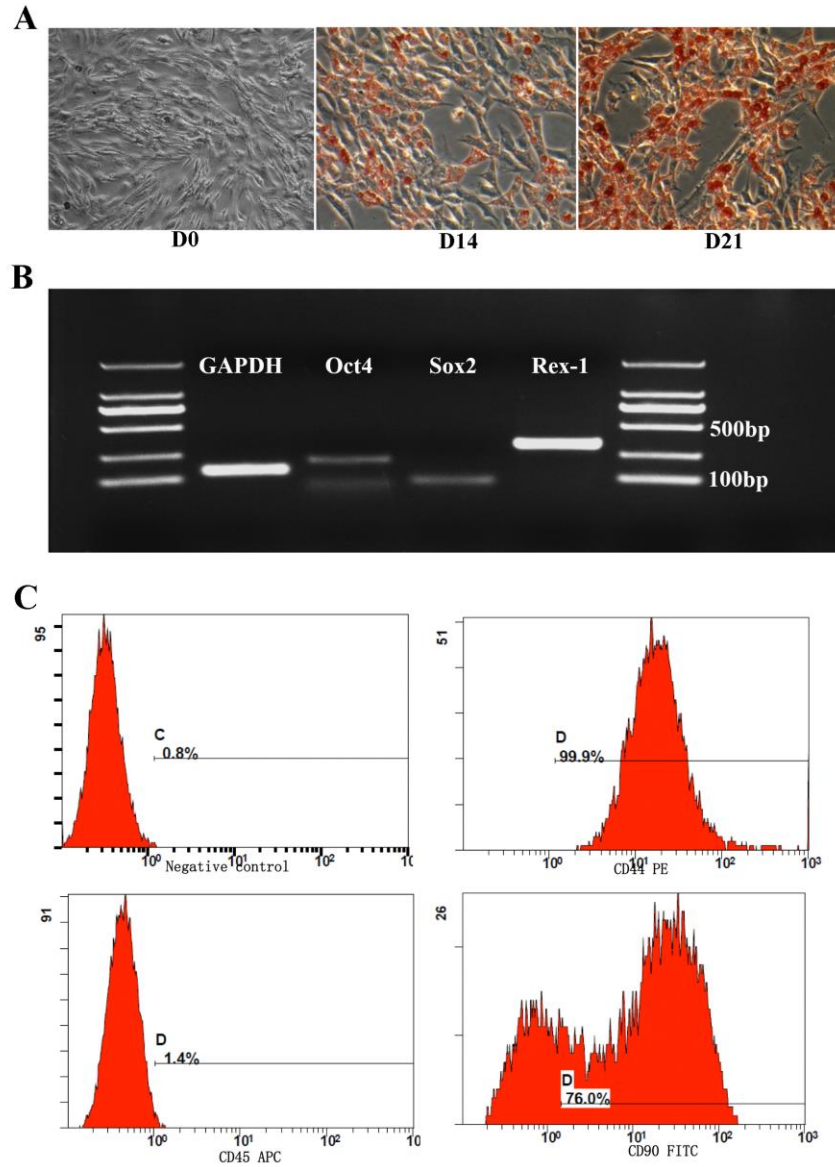

**Fig. S4 Identification of MSCs Isolated from Fetal Rat (D13) Bone Marrow.** (A) Morphology of MSCs before differentiation (D0), Oil red staining at days 14 and 21 of proliferation. (B) Determination of transcription factors, Oct4, Sox2 and Rex1 in MSCs by RT-PCR. (C) Surface markers of MSCs were verified by the flow cytometry.

**Supplementary Figure 5.** Elevated blood pressure in offspring with different birth weight associated with sustained increased leptin levels.

**Fig. S5**

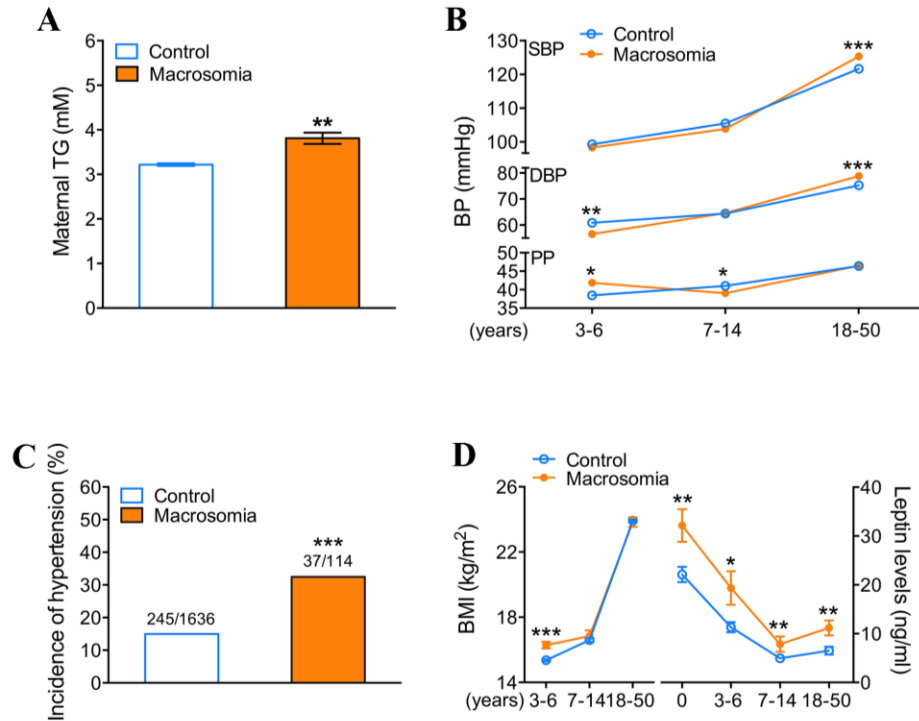

**Fig. S5. Elevated blood pressure in offspring with different birth weight associated with sustained increased leptin levels.** (A) Incidence of macrosomia in low (n=1625) and high (n=1062) mTG groups. (B) Blood pressures in offspring of different ages from macrosomia and control groups. (C) Incidence of hypertension in adults aged 30-50 years from macrosomia and control groups (SBP $\geq$ 140 mmHg and/or DBP $\geq$ 90 mmHg, OR 2.73, 95CI 1.80-4.13,  $p < 0.0001$ ). (D) BMI in offspring of different ages in control (n=776, 890 and 2892 for 3-6, 7-14 and 18-50 years, respectively) and macrosomia (n=82, 76 and 187 for 3-6, 7-14, 18-50 years, respectively) groups. Serum leptin levels in offspring of different ages in control (n=25, 19 and 12 for 3-6, 7-14 and 18-50 years, respectively) and macrosomia (n=15, 13 and 11 for 3-6, 7-14 and 18-50 years, respectively) groups. Values (in A, B and D are expressed as means  $\pm$  SE, \*\*\* $p < 0.0001$  \*\* $p < 0.01$ , \* $p < 0.05$ , compared to the corresponding control.

Original images of gels/blots for supplementary figure S2:

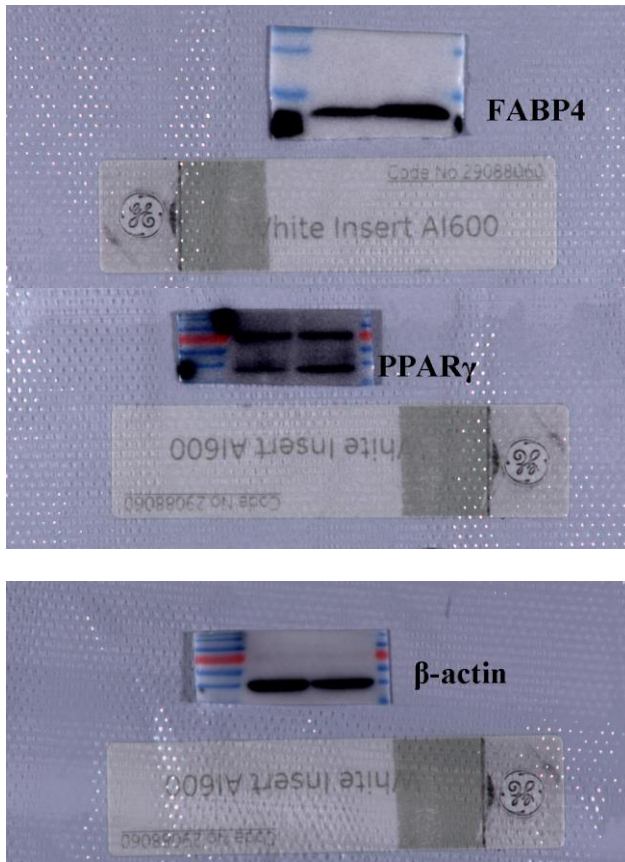

Original images of gels/blots for figure 4B and supplementary figure 3:

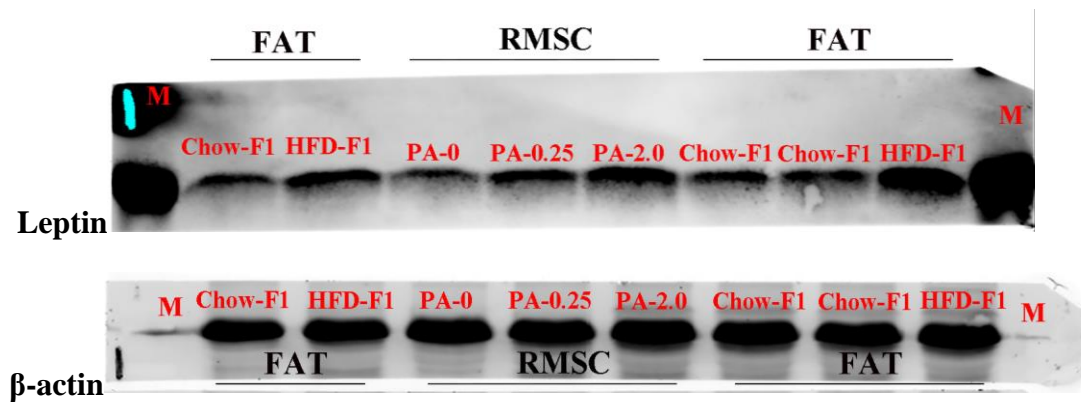

**Supplementary Table S1. Maternal characteristics of newborns between different mTG groups.**

|                                            | Low mTG<br>( $\leq 3.28$ mM, n=1625) | High mTG<br>( $> 3.28$ mM, n=1062) | P value <sup>1</sup> |
|--------------------------------------------|--------------------------------------|------------------------------------|----------------------|
| <b>Maternal</b>                            |                                      |                                    |                      |
| Age (year)                                 | 28.28 $\pm$ 3.62 <sup>2</sup>        | 28.10 $\pm$ 13.64                  | 0.270                |
| Weight (kg)                                | 69.00 $\pm$ 7.78                     | 69.57 $\pm$ 8.05                   | 0.071                |
| Height (cm)                                | 160.59 $\pm$ 4.60                    | 160.44 $\pm$ 4.36                  | 0.412                |
| BMI of late pregnancy (kg/m <sup>2</sup> ) | 26.75 $\pm$ 2.81                     | 27.02 $\pm$ 2.92                   | 0.019                |
| Weight gain (kg)                           | 16.51 $\pm$ 3.89                     | 16.67 $\pm$ 3.99                   | 0.329                |
| Triglyceride (mM)                          | 2.39 $\pm$ 0.54                      | 4.64 $\pm$ 1.54                    | <0.0001              |
| Total cholesterol (mM)                     | 5.98 $\pm$ 1.07                      | 6.55 $\pm$ 1.26                    | <0.0001              |
| HDL cholesterol (mM)                       | 1.88 $\pm$ 0.41                      | 1.75 $\pm$ 0.40                    | <0.0001              |
| LDL cholesterol (mM)                       | 2.76 $\pm$ 0.97                      | 3.04 $\pm$ 0.83                    | <0.0001              |
| <b>Neonatal</b>                            |                                      |                                    |                      |
| Gestational age (wk)                       | 38.90 $\pm$ 1.01                     | 38.94 $\pm$ 1.09                   | 0.490                |
| Placenta area (cm <sup>2</sup> )           | 363.88 $\pm$ 82.94                   | 361.58 $\pm$ 76.82                 | 0.838                |
| Male/female sex (n)                        | 853/772                              | 558/504                            | 1.000                |
| Weight (g)                                 | 3388.96 $\pm$ 397.64                 | 3444.60 $\pm$ 443.65               | 0.001                |
| Length (cm)                                | 50.77 $\pm$ 1.02                     | 50.84 $\pm$ 1.07                   | 0.676                |
| Number of macrosomia (n)                   | 144                                  | 168                                | <0.0001              |

Note: <sup>1</sup>Data were analyzed by using Student's t, Mann-Whitney U, and chi-square tests;

<sup>2</sup>Mean $\pm$ SD (all such values).



**Supplementary Table S2. Children's characteristics between different mTG groups**

|                               | Low mTG<br>( $\leq 3.28\text{mM}$ , n=59) | High mTG<br>( $> 3.28\text{mM}$ , n=62) | <i>P</i> value <sup>1</sup> |
|-------------------------------|-------------------------------------------|-----------------------------------------|-----------------------------|
| Age (months)                  | 58.72 $\pm$ 13.12 <sup>2</sup>            | 57.18 $\pm$ 12.83                       | 0.257                       |
| Birth weight (g)              | 3488.14 $\pm$ 505.35                      | 3733.87 $\pm$ 591.52                    | 0.008                       |
| Weight (kg)                   | 19.29 $\pm$ 3.41                          | 18.87 $\pm$ 3.97                        | 0.265                       |
| Height (cm)                   | 110.74 $\pm$ 6.46                         | 110.07 $\pm$ 8.99                       | 0.322                       |
| BMI (kg/m <sup>2</sup> )      | 15.65 $\pm$ 1.56                          | 15.43 $\pm$ 1.20                        | 0.196                       |
| BMI z-score                   | -0.10 $\pm$ 1.12                          | -0.18 $\pm$ 0.89                        | 0.330                       |
| Systolic BP (mmHg)            | 96.86 $\pm$ 8.20                          | 99.48 $\pm$ 8.91                        | 0.059                       |
| Diastolic BP (mmHg)           | 57.21 $\pm$ 7.86                          | 57.40 $\pm$ 7.17                        | 0.911                       |
| Mean arterial pressure (mmHg) | 70.43 $\pm$ 6.74                          | 71.42 $\pm$ 6.18                        | 0.784                       |
| Pulse Pressure (mmHg)         | 39.65 $\pm$ 9.01                          | 42.08 $\pm$ 10.09                       | 0.096                       |
| Heart rate (times/minute)     | 96.11 $\pm$ 14.01                         | 97.47 $\pm$ 12.72                       | 0.303                       |

Note: 1, Data were analyzed by using Student's t, Mann-Whitney U, and chi-square tests;  
2, Mean $\pm$ SD (all such values).

**Supplementary Table S3. Maternal characteristics of newborns in normal birth weight (control) and high birth weight (macrosomia) groups.**

|                                            | Control<br>(2500-3999g, n=2375) | Macrosomia<br>(≥4000g, n=312) | <i>P</i> value <sup>1</sup> |
|--------------------------------------------|---------------------------------|-------------------------------|-----------------------------|
| <b>Maternal</b>                            |                                 |                               |                             |
| Age (year)                                 | 28.19±2.11 <sup>2</sup>         | 28.24±1.77                    | 0.866                       |
| Weight (kg)                                | 68.52±4.37                      | 75.00±4.69                    | <0.0001                     |
| Height (cm)                                | 160.35±2.56                     | 161.99±2.66                   | <0.0001                     |
| BMI of late pregnancy (kg/m <sup>2</sup> ) | 26.64±1.59                      | 28.58±1.76                    | <0.0001                     |
| Weight gain (kg)                           | 16.43±2.22                      | 17.7±2.51                     | <0.0001                     |
| Triglyceride (mM)                          | 3.22±0.82                       | 3.81±1.22                     | <0.0001                     |
| Total cholesterol (mM)                     | 6.11±0.68                       | 6.22±0.70                     | 0.151                       |
| HDL cholesterol (mM)                       | 1.85±0.24                       | 1.71±0.24                     | <0.0001                     |
| LDL cholesterol (mM)                       | 2.96±0.52                       | 2.72±0.50                     | <0.0001                     |
| Fasting glucose (mM)                       | 4.21±0.52                       | 4.27±0.51                     | 0.083                       |
| <b>Neonatal</b>                            |                                 |                               |                             |
| Gestational age (wk)                       | 38.87±0.60                      | 39.35±0.56                    | <0.0001                     |
| Placenta area (cm <sup>2</sup> )           | 320.28±28.78                    | 382.00±50.25                  | <0.0001                     |
| Male/female sex (n)                        | 1225/1150                       | 199/113                       | <0.0001                     |
| Weight (g)                                 | 3317.28±190.67                  | 4177.21±125.27                | <0.0001                     |
| Length (cm)                                | 49.90±0.32                      | 51.00±0.62                    | <0.0001                     |

Note: <sup>1</sup>Data were analyzed by using Student's t, Mann-Whitney U, and chisquare tests;

<sup>2</sup>Mean±SD (all such values).

**Supplementary Table S4. Anthropometric indexes and serum leptin in children aged 3-6 years.**

|                          | Control<br>(2500-3999g, n=776) | Macrosomia<br>(≥4000g, n=82) | <i>P</i> value <sup>1</sup> |
|--------------------------|--------------------------------|------------------------------|-----------------------------|
| Age (month)              | 50.18±10.31 <sup>2</sup>       | 61.36±8.44                   | 0.158                       |
| Male/female sex (n)      | 416/360                        | 53/29                        | 0.062                       |
| Height (cm)              | 104.71±7.52                    | 108.12±6.62                  | <0.001                      |
| Weight (kg)              | 16.99±3.49                     | 19.13±3.44                   | <0.001                      |
| BMI (kg/m <sup>2</sup> ) | 15.36±1.82                     | 16.29±1.87                   | <0.001                      |
| Systolic BP (mmHg)       | 99.32±10.74                    | 98.35±7.50                   | 0.306                       |
| Diastolic BP (mmHg)      | 60.87±8.94                     | 56.51±6.51                   | 0.003                       |
| Pulse Pressure (mmHg)    | 38.46±10.39                    | 41.84±9.32                   | 0.039                       |

Note: <sup>1</sup>Data were analyzed by using Student's t, Mann-Whitney U, and chi-square tests;

<sup>2</sup>Mean±SD (all such values); BP, blood pressure.

**Supplementary Table S5. Anthropometric indexes and serum leptin in children aged 7-14 years.**

|                          | Control<br>(2500-3999g, n=890) | Macrosomia<br>(≥4000g, n=76) | <i>P</i> value <sup>1</sup> |
|--------------------------|--------------------------------|------------------------------|-----------------------------|
| Age (year)               | 8.98±1.88 <sup>2</sup>         | 8.94±2.26                    | 0.439                       |
| Male/female sex (n)      | 483/407                        | 46/30                        | 0.337                       |
| Height (cm)              | 134.57±12.73                   | 138.78±12.97                 | 0.003                       |
| Weight (kg)              | 30.63±9.92                     | 33.13±10.97                  | 0.018                       |
| BMI (kg/m <sup>2</sup> ) | 16.60±3.37                     | 16.84±3.06                   | 0.269                       |
| Systolic BP (mmHg)       | 105.48±10.70                   | 103.83±9.62                  | 0.113                       |
| Diastolic BP (mmHg)      | 64.44±8.64                     | 64.61±8.44                   | 0.438                       |
| Pulse Pressure (mmHg)    | 41.03±9.67                     | 39.02±6.73                   | 0.048                       |

Note: <sup>1</sup>Data were analyzed by using Student's t, Mann-Whitney U, and chi-square tests;

<sup>2</sup>Mean±SD (all such values).

**Supplementary Table S6. Anthropometric indexes and serum leptin in adults of 18-50 years old.**

|                          | Control<br>(2500-3999g, n=2892) | Macrosomia<br>(≥4000g, n=187) | <i>P</i> value <sup>1</sup> |
|--------------------------|---------------------------------|-------------------------------|-----------------------------|
| Age (year)               | 31.02±6.69 <sup>2</sup>         | 30.60±14.63                   | 0.173                       |
| Male/female sex (n)      | 1609/1283                       | 97/90                         | 0.324                       |
| Height (cm)              | 167.11±7.55                     | 169.21±7.95                   | <0.001                      |
| Weight (kg)              | 67.10±12.70                     | 68.58±14.04                   | 0.067                       |
| BMI (kg/m <sup>2</sup> ) | 23.91±3.70                      | 23.84±3.99                    | 0.397                       |
| Systolic BP (mmHg)       | 121.66±13.88                    | 125.32±17.04                  | <0.0001                     |
| Diastolic BP (mmHg)      | 75.26±10.01                     | 78.84±12.50                   | <0.0001                     |
| Pulse Pressure (mmHg)    | 46.40±10.16                     | 46.48±10.98                   | 0.460                       |

Note: <sup>1</sup>Data were analyzed by using Student's t, Mann-Whitney U, and chi-square tests;

<sup>2</sup>Mean±SD (all such values).

**Supplementary Table S7. Anthropometric indexes in adults of 30-50 years old.**

|                          | Control<br>(2500-3999g, n=1636) | Macrosomia<br>(≥4000g, n=114) | <i>P</i> value <sup>1</sup> |
|--------------------------|---------------------------------|-------------------------------|-----------------------------|
| Age (year)               | 36.47±5.71 <sup>2</sup>         | 36.08±5.70                    | 0.245                       |
| Male/female sex (n)      | 761/875                         | 54/60                         | 0.923                       |
| Height (cm)              | 165.32±7.63                     | 167.34±7.38                   | 0.003                       |
| Weight (kg)              | 64.93±12.66                     | 67.44±13.96                   | 0.002                       |
| BMI (kg/m <sup>2</sup> ) | 23.63±3.71                      | 23.98±4.16                    | 0.167                       |
| Systolic BP (mmHg)       | 122.45±14.64                    | 128.22±18.65                  | <0.0001                     |
| Diastolic BP (mmHg)      | 76.40±10.65                     | 80.74±14.19                   | <0.0001                     |
| Pulse Pressure (mmHg)    | 46.05±10.26                     | 47.48±10.92                   | 0.076                       |

Note: <sup>1</sup>Data were analyzed by using Student's t, Mann-Whitney U, and chi-square tests;

<sup>2</sup>Mean±SD (all such values).
